# Supplementary material
Source: PubMed Central journal article supplement (PMC4637213)

1 **SUPPLEMENTARY MATERIALS**

2

3 **SUPPLEMENTARY METHOD**

4

5 *1. Action potential recordings*

6

7 Spontaneous action potentials (APs) were recorded in single HL-1 cell using the patch-clamp  
8 technique in perforated-patch configuration (Amphotericin B method) [1]. Cells were placed in  
9 an experimental bath on the stage of an inverted microscope (Nikon Eclipse Ti, Japan) and  
10 superfused with normal Tyrode's solution containing: NaCl 132 mM, KCl 4 mM, MgCl<sub>2</sub> 1.2  
11 mM, HEPES 10 mM, CaCl<sub>2</sub> 1.8 mM and Glucose 11 mM (pH 7.35, NaOH). APs were measured  
12 with a patch amplifier (Multipatch 700B; Molecular Devices Inc., USA), signals were digitized  
13 via a DAC/ADC interface (Digidata 1550; Molecular Devices Inc., USA) and data acquired by  
14 means of pCLAMP 10.1 software (Molecular Devices Inc., USA).

15 Patch-clamp pipettes, prepared from glass capillary tubes by means of a horizontal puller  
16 (Flaming/Brown micropipette puller, model P-1000; Sutter Instrument) had a resistance of 2.5-  
17 3.5 MΩ when filled with the internal solution containing: K Methanesulfonate 115 mM, KCl 25  
18 mM, HEPES 10 mM, MgCl<sub>2</sub> 3 mM, Amphotericin B 0.13 mM (pH 7.00 KOH). Temperature was  
19 maintained at  $36.5 \pm 0.5^\circ\text{C}$  throughout the experiment.

20

21 *2. Optical impulse propagation*

22 Impulse propagation was assessed optically [2] in HL-1 cell line monolayer. Briefly, the cells  
23 were seeded onto 22 mm glass coverslips until the confluence has been reached. Then the  
24 preparations were stained using a voltage sensitive dye (135 μM Di-8-ANNEPPS) for 4 min and  
25 mounted on a custom-made temperature controlled chamber. Impulse propagation was assessed  
26 optically using a fast-resolution CMOS camera (L-Ultima, Scimedia, USA) and recorded at 10X  
27 magnification (Nikon Eclipse Ti) for 8 sec. Preparations were perfused continuously with Hanks  
28 Balanced Salts Solution (Gibco, UK). Extracellular stimulation has been achieved using a glass  
29 micropipette electrode positioned 1 mm from the cell surface at the periphery of the monolayer  
30 (ca. 1 cm away from the field of view for avoiding electrical artefact). Preparation were pre-  
31 stimulated using 15 consecutive stimuli (10 V amplitude, 2 ms duration at 0.5 Hz, Grass

32 Apparatus) for reaching the steady state and the impulse propagation recorded from the last 8  
33 seconds.

### 34 *3. Cell viability assay*

35  
36 Cell viability after stimulation was assessed performing Propidium Iodide (PI) staining (at a final  
37 concentration of 1 µg/ml) according to manufacturer's instructions (Bender MedSystems, USA)  
38 or counting HL-1 cells with Trypan blue.

### 40 *4. Neonatal rat ventricular cardiomyocyte (NRCM) isolation*

41  
42 The procedures used in this work conform to National and European directives for the care and  
43 use of laboratory animals (D.L. 116/1992; 86/609/CEE). Animal protocols were reviewed and  
44 approved by the local Institutional Review Board and by the Italian Ministry of Health. As  
45 previously described [3] hearts were collected from 48 hours Sprague Dawley (Charles River,  
46 USA) and put into ice-cold PBS, where atriums were removed and residual ventricles were cut  
47 into small pieces. Heart fragments were then digested in four 20 minutes steps at 37 °C, using an  
48 enzyme digestion solution containing 136.8 U/ml collagenase CLS I (Worthington biochemical  
49 Corp., USA), 0.6 mg/ml pancreatin (Sigma-Aldrich, USA) in ADS buffer (116.4 mM NaCl, 5.4  
50 mM KCl, 5.5 mM Glucose, 1 mM NaH<sub>2</sub>PO<sub>4</sub> H<sub>2</sub>O, 0.8 mM MgSO<sub>4</sub> H<sub>2</sub>O, 20 mM Hepes, pH 7.4).  
51 NRCMs were purified by using a Percoll (Sigma-Aldrich, USA) step gradient and centrifuging at  
52 3000 rpm for 30 min at room temperature in a swinging bucket rotor, switching-off the  
53 centrifuge brakes. Fibroblast cells, in the upper phase, were removed by aspiration and NRCMs  
54 were collected and washed in ADS buffer. Cardiomyocytes were finally resuspended in plating  
55 medium (4:1 DMEM:M199) containing 10% horse serum, 5% FBS, 1% Sodium Pyruvate,  
56 10000 U/ml Penicillin, 10000 µg/ml Streptomycin and 20 mM L-Glutamine (all from Sigma-  
57 Aldrich, USA) and plated at a density of 80000 cells/cm<sup>2</sup> on dishes coated with 0.1% gelatin.  
58 The following day, the plating medium was substituted with maintenance medium (4:1  
59 DMEM:M199, 5% horse serum, 5% FBS, 1% Sodium Pyruvate, 10 mM cytosine arabinoside  
60 (Ara-C), 10000 U/ml Penicillin, 10000 µg/ml Streptomycin and 20 mM L-Glutamine (all from  
61 Sigma-Aldrich, USA). The purity of cultured NRCMs was approximately 90% when the number

62 of cell nuclei (DAPI-positive) was compared with the number of myocytes (Troponin-C-  
63 positive).

64

#### 65 *5. Human adult cardiac stromal cell isolation*

66

67 Human adult cardiac fibroblasts were isolated as stromal cells and amplified as previously  
68 described [4] from small fragments of right auricles obtained from patients undergoing either  
69 coronary bypass or valve substitution following Local Ethic Committee approval and signed  
70 informed consent in accordance with the declaration of Helsinki.

71

#### 72 *6. Real Time RT-PCR*

73

74 For gene expression analysis, total RNA was extracted using TRIzol reagent and 1 µg of RNA  
75 was reversely transcribed using SuperScript® VILO cDNA Synthesis Master Mix (Invitrogen,  
76 USA). cDNA was amplified by SYBR-GREEN quantitative PCR on CFX96™ Real-Time PCR  
77 Detection System (Bio-Rad, USA). Five candidate housekeeping genes, among several  
78 commonly used ones, were investigated in order to select the most stable in HL-1 cell model:  
79 glyceraldehyde-3-phosphate dehydrogenase (GAPDH), β-Actin (ACTB), hypoxanthine guanine  
80 phosphoribosyl transferase (HPRT), TATA box binding protein (TBP) and β-2 microglobulin  
81 (B2M). NormFinder software [5] was used to identify the optimal normalization gene among the  
82 selected candidates and TBP resulted as the most suitable housekeeping gene for Connexin-43  
83 (Cx43) expression study. The following primers for mouse Cx43 and TBP were used: TBP fw 5'-  
84 TCAAACCCAGAATTGTTCTCC-3'; TBP rev 5'-AACTATGTGGTCTTCCTGAATCC-3';  
85 Cx-43 fw 5'-ACTCCTGTACTTGGCTCACGT -3'; Cx-43 rev 5'-  
86 CCTTGCCGTGTTCTTCAATCC -3'.

87 Raw expression intensities of Cx43 were normalized to the Ct value of TBP, chosen as internal  
88 control. Relative quantitation was performed using the  $\Delta\Delta C_t$  method. Fold changes in gene  
89 expression were estimated as  $2^{(-\Delta\Delta C_t)}$  [6].

90

#### 91 *7. Cell immunofluorescence*

92

93 HL-1 cells were fixed in 4% PFA for 10 min at room temperature and permeabilized with 0.2%  
94 Triton X-100 for 5 min at room temperature. After blocking for 1 h at room temperature with  
95 PBS containing 5% goat serum, cells were incubated overnight at 4°C with a rabbit polyclonal  
96 anti-Cx43 antibody (Abcam Cat# ab11370, UK) (dilution 1:400) in PBS supplemented with 2%  
97 goat serum. The following day, cells were washed three times with PBS and then incubated for 1  
98 h at 37°C with the FITC-conjugated goat anti-rabbit secondary antibody (dilution 1:200) diluted  
99 in PBS supplemented with 2% goat serum. Nuclei were counterstained with Hoescht 33342  
100 (Sigma-Aldrich, USA). Epifluorescence images were obtained using a confocal microscope  
101 (LSM710 ConfoCor3, Zeiss, Germany) equipped with a 40X oil objective. Image acquisition  
102 was carried out at room temperature using the Zen imaging software (Zeiss, Germany).  
103 Brightness/contrast adjustment was performed in Adobe Photoshop.

104

## 105 **BIBLIOGRAPHY**

106 [1] Cerbai E, Barbieri M, Li Q, Mugelli A. Ionic basis of action potential prolongation of  
107 hypertrophied cardiac myocytes isolated from hypertensive rats of different ages. *Cardiovasc Res*  
108 1994;28:1180-7.

109 [2] Miragoli M, Kadir SH, Sheppard MN, Salvarani N, Virta M, Wells S et al. A protective  
110 antiarrhythmic role of ursodeoxycholic acid in an in vitro rat model of the cholestatic fetal heart.  
111 *Hepatology* 2011;54:1282-92.

112 [3] Avitabile D, Crespi A, Brioschi C, Parente V, Toietta G, Devanna P et al. Human cord blood  
113 CD34+ progenitor cells acquire functional cardiac properties through a cell fusion process. *Am J*  
114 *Physiol Heart Circ Physiol* 2011;300:H1875-84.

115 [4] Rossini A, Frati C, Lagrasta C, Graiani G, Scopece A, Cavalli S et al. Human cardiac and  
116 bone marrow stromal cells exhibit distinctive properties related to their origin. *Cardiovasc Res*  
117 2011;89:650-60.

118 [5] Andersen CL, Jensen JL, Orntoft TF. Normalization of real-time quantitative reverse  
119 transcription-PCR data: a model-based variance estimation approach to identify genes suited for  
120 normalization, applied to bladder and colon cancer data sets. *Cancer Res* 2004;64:5245-50.

121 [6] Livak KJ, Schmittgen TD. Analysis of relative gene expression data using real-time  
122 quantitative PCR and the 2(-Delta Delta C(T)) Method. *Methods* 2001;25:402-8.

123

124

125 **SUPPLEMENTARY FIGURES**

126

127 **Supplementary Fig. 1: Electrical impulse propagation optically assessed in monolayers of**  
128 **HL-1 cells. (A)** Spontaneous electrical activity originated from the lower left corner of the image  
129 and propagated throughout the monolayer (top left). Activation time map (5 ms interdistance) of  
130 the same propagation (top right). Spontaneous optical action potential recorded during 8 sec  
131 recording (ca. 0.5 Hz) (bottom). **(B)** Same as A showing a quiescent state of the monolayer  
132 during recording (no extracellular stimulation).

133

134 **Supplementary Fig. 2: Effect of different chronic pacing conditions (0.5, 1 and 3 Hz) at**  
135 **different time points (1.5 hours, 24 hours and 4 days) on Cx43 expression and viability.**  
136 Representative images of HL-1 cells stimulated at 0.5 Hz **(A)**, 1 Hz **(C)** and 3 Hz **(E)** at different  
137 time points. Western blot analysis shows Cx43 expression in NS and St HL-1 cells at 0.5 Hz **(B)**  
138 and 1 Hz **(D)** for 1.5 and 24 hours and at 3 Hz for 1.5 hours **(F)** (n=3). Cell viability evaluation  
139 using Trypan blue of NS and St HL-1 after 24 hours pacing at 1 Hz **(D)** and 3 Hz **(F)**. Data are  
140 presented as mean  $\pm$  s.e.m, unpaired Student t-test: \*  $p < 0.05$ .

141

142 **Supplementary Fig. 3: Effect of HDAC inhibitors on Cx43 expression and localization. (A)**  
143 Western Blot analysis of HL-1 cells treated with 500 nM of TSA and 2.5  $\mu$ M of SAHA at  
144 different time points. **(B)** Confocal analysis of Cx43 expression and distribution on HL-1 cells.  
145 Samples were analyzed before and after 4 hours treatment with 500 nM TSA. Nuclei were  
146 counterstained with Hoescht (blue). Scale bar = 25  $\mu$ m.

147

148 **Supplementary Fig. 4: Effect of electrical stimulation on Cx43 phosphorylation. (A)**  
149 Representative Western Blot analysis images showing a typical phosphorylation banding patterns  
150 in NS and St HL-1 cells, detected by a specific total Cx43 antibody against amino acids 1–20  
151 (n=4). **(B)** Western blot and densitometric analysis of NS and St HL-1 cells for Cx43  
152 phosphorylation at the specific inhibitory residue Ser368 (n=6). Data are presented as mean  $\pm$   
153 s.e.m, unpaired Student t-test: \*  $p < 0.05$ .

154

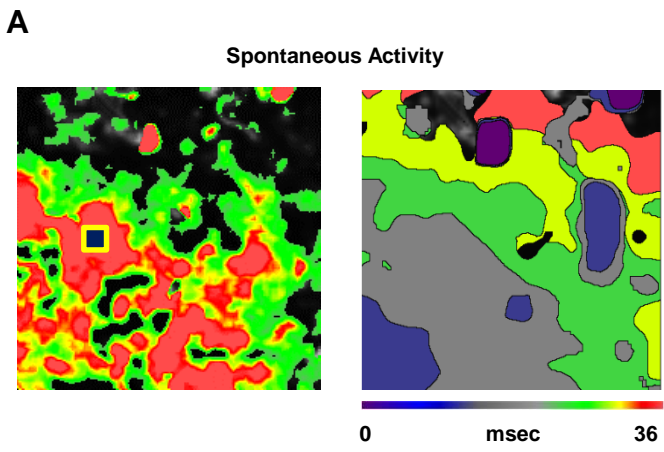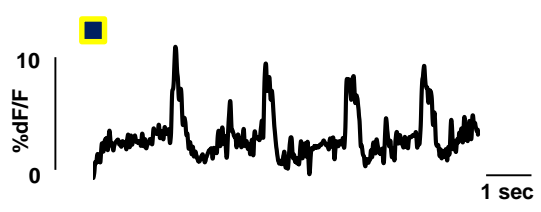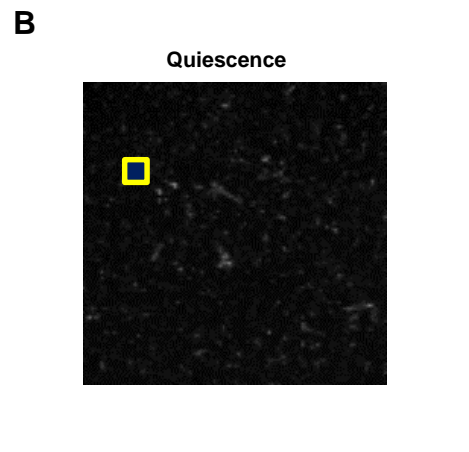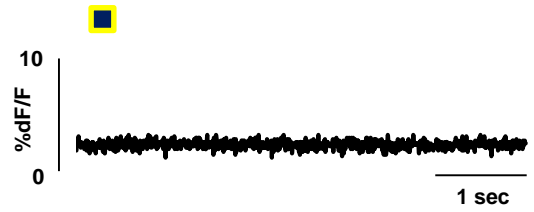

**Supplementary Fig.2**

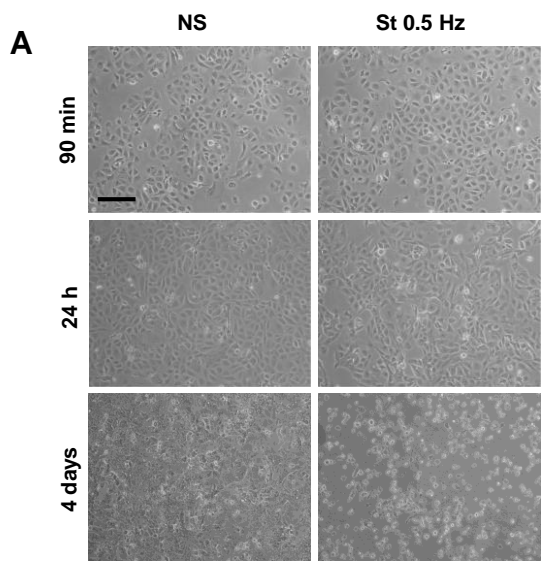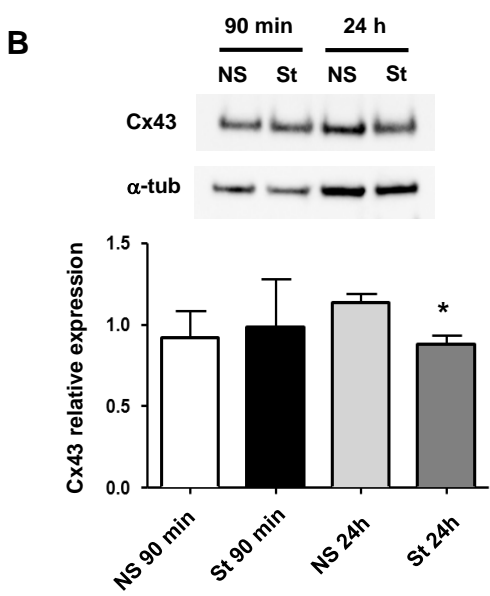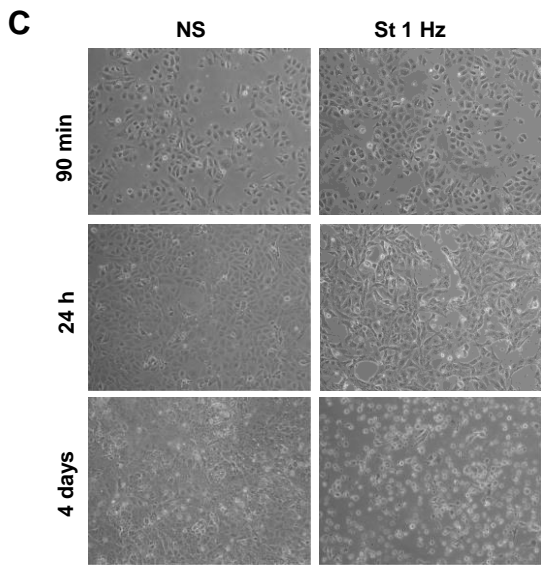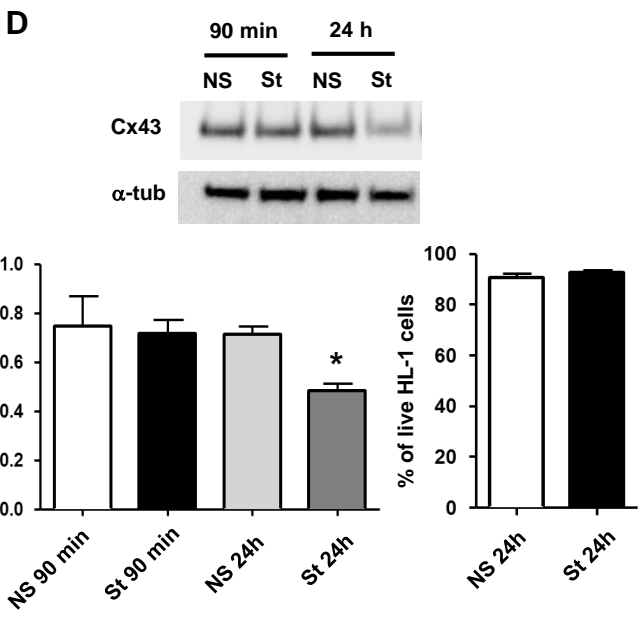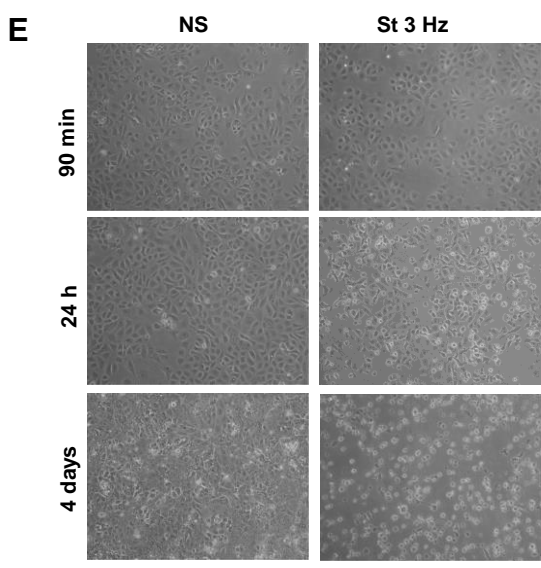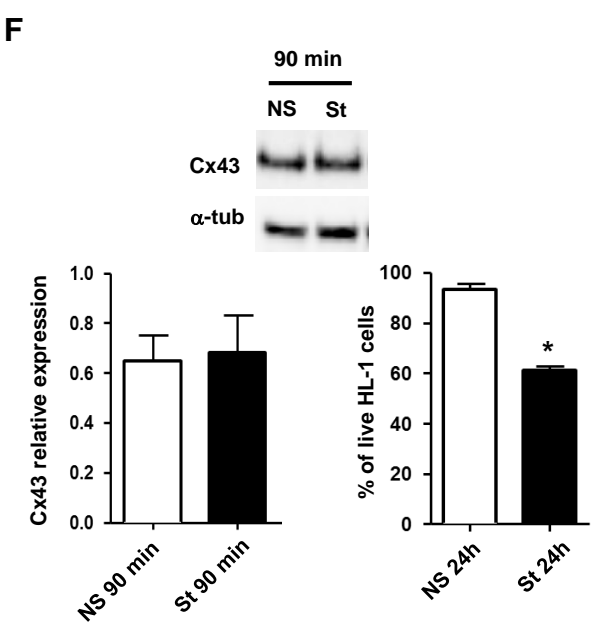

Supplementary Fig. 3

A

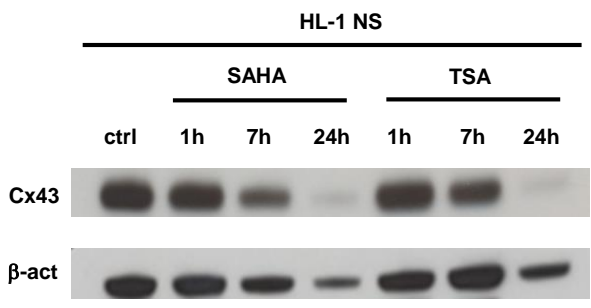

B

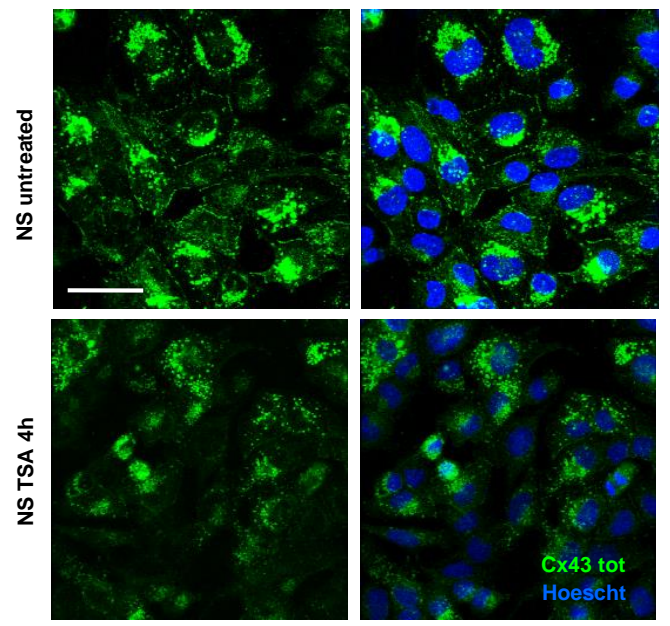



Supplementary Fig. 4

**A**

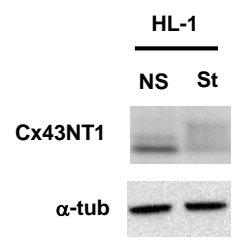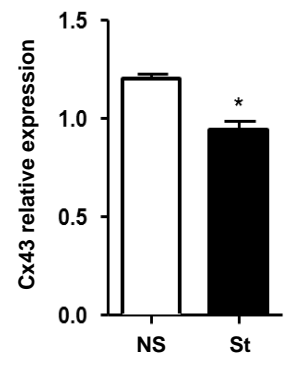

**B**

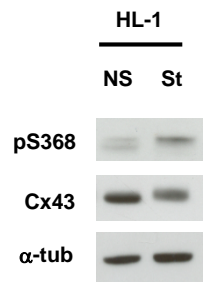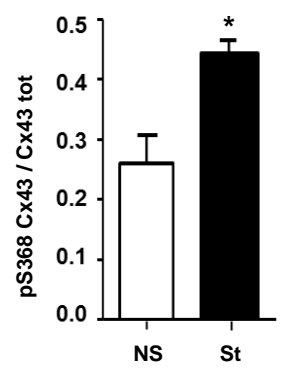

Supplement: NIHMS719847-supplement.pdf [file NIHMS719847-supplement.pdf]
